# Supplementary material for: Exploring novel risk loci for heart failure and the shared genetic etiology with blood lipids, blood pressure, and blood glucose: a large-scale multi-trait association analysis
Source: bioRxiv or medRxiv preprint supplement (doi:10.1101/2023.12.20.23300280), 2023-12-21

**a****Gene-mapping****HF-Blood lipids****HF-Blood pressure****HF-Blood glucose**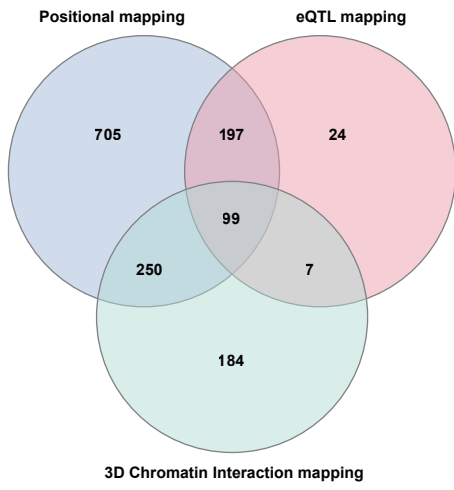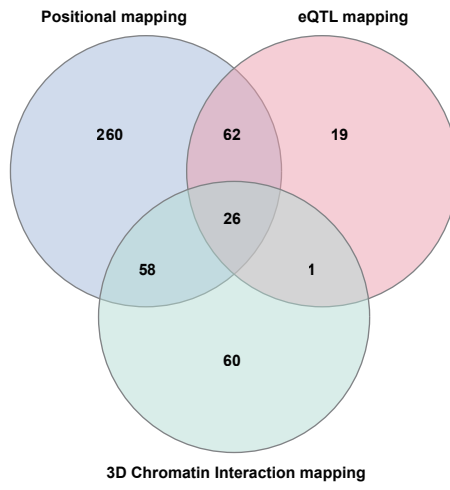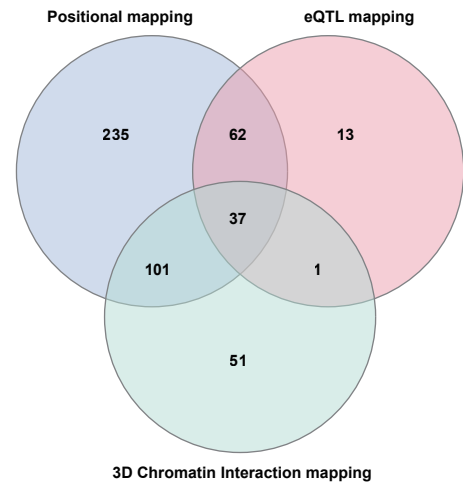**Gene-mapping**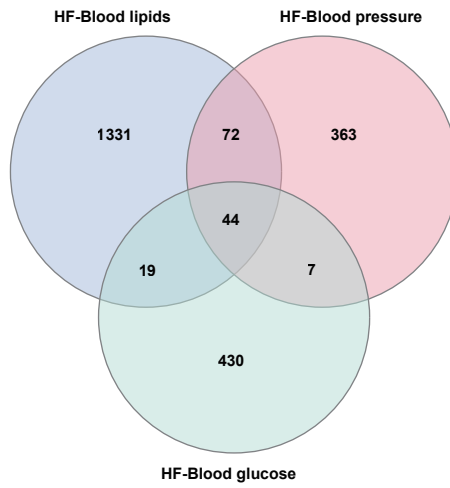**b****MAGMA & TWAS****HF-Blood lipids****HF-Blood pressure****HF-Blood glucose**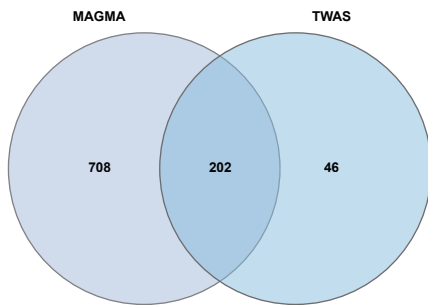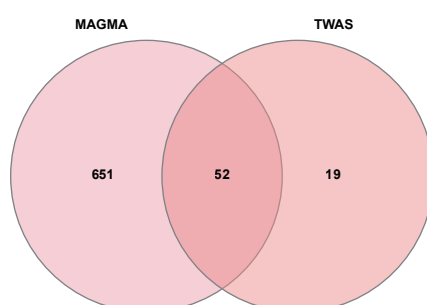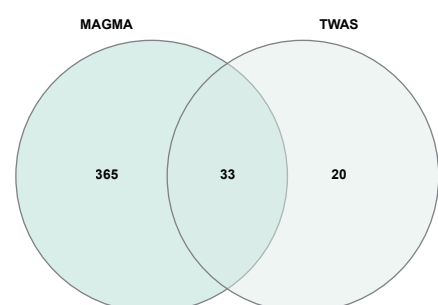**MAGMA****TWAS**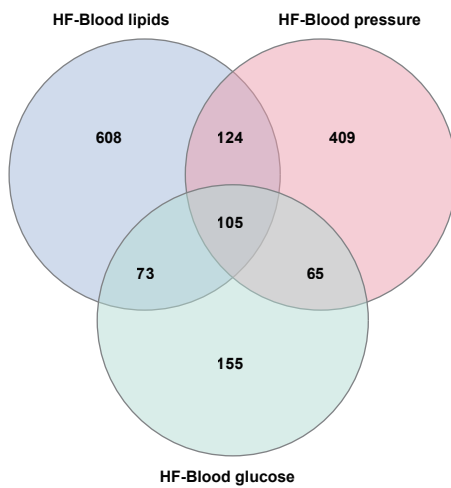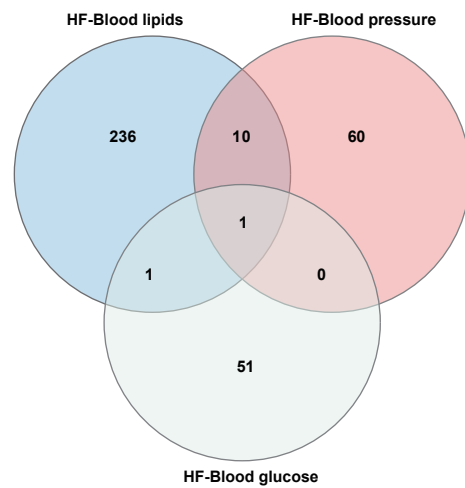

Supplement: Supplementary file [file media-5.pdf]
