# Supplementary material for: Exploring novel risk loci for heart failure and the shared genetic etiology with blood lipids, blood pressure, and blood glucose: a large-scale multi-trait association analysis
Source: bioRxiv or medRxiv preprint supplement (doi:10.1101/2023.12.20.23300280), 2023-12-21

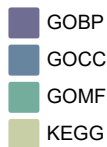

**A**

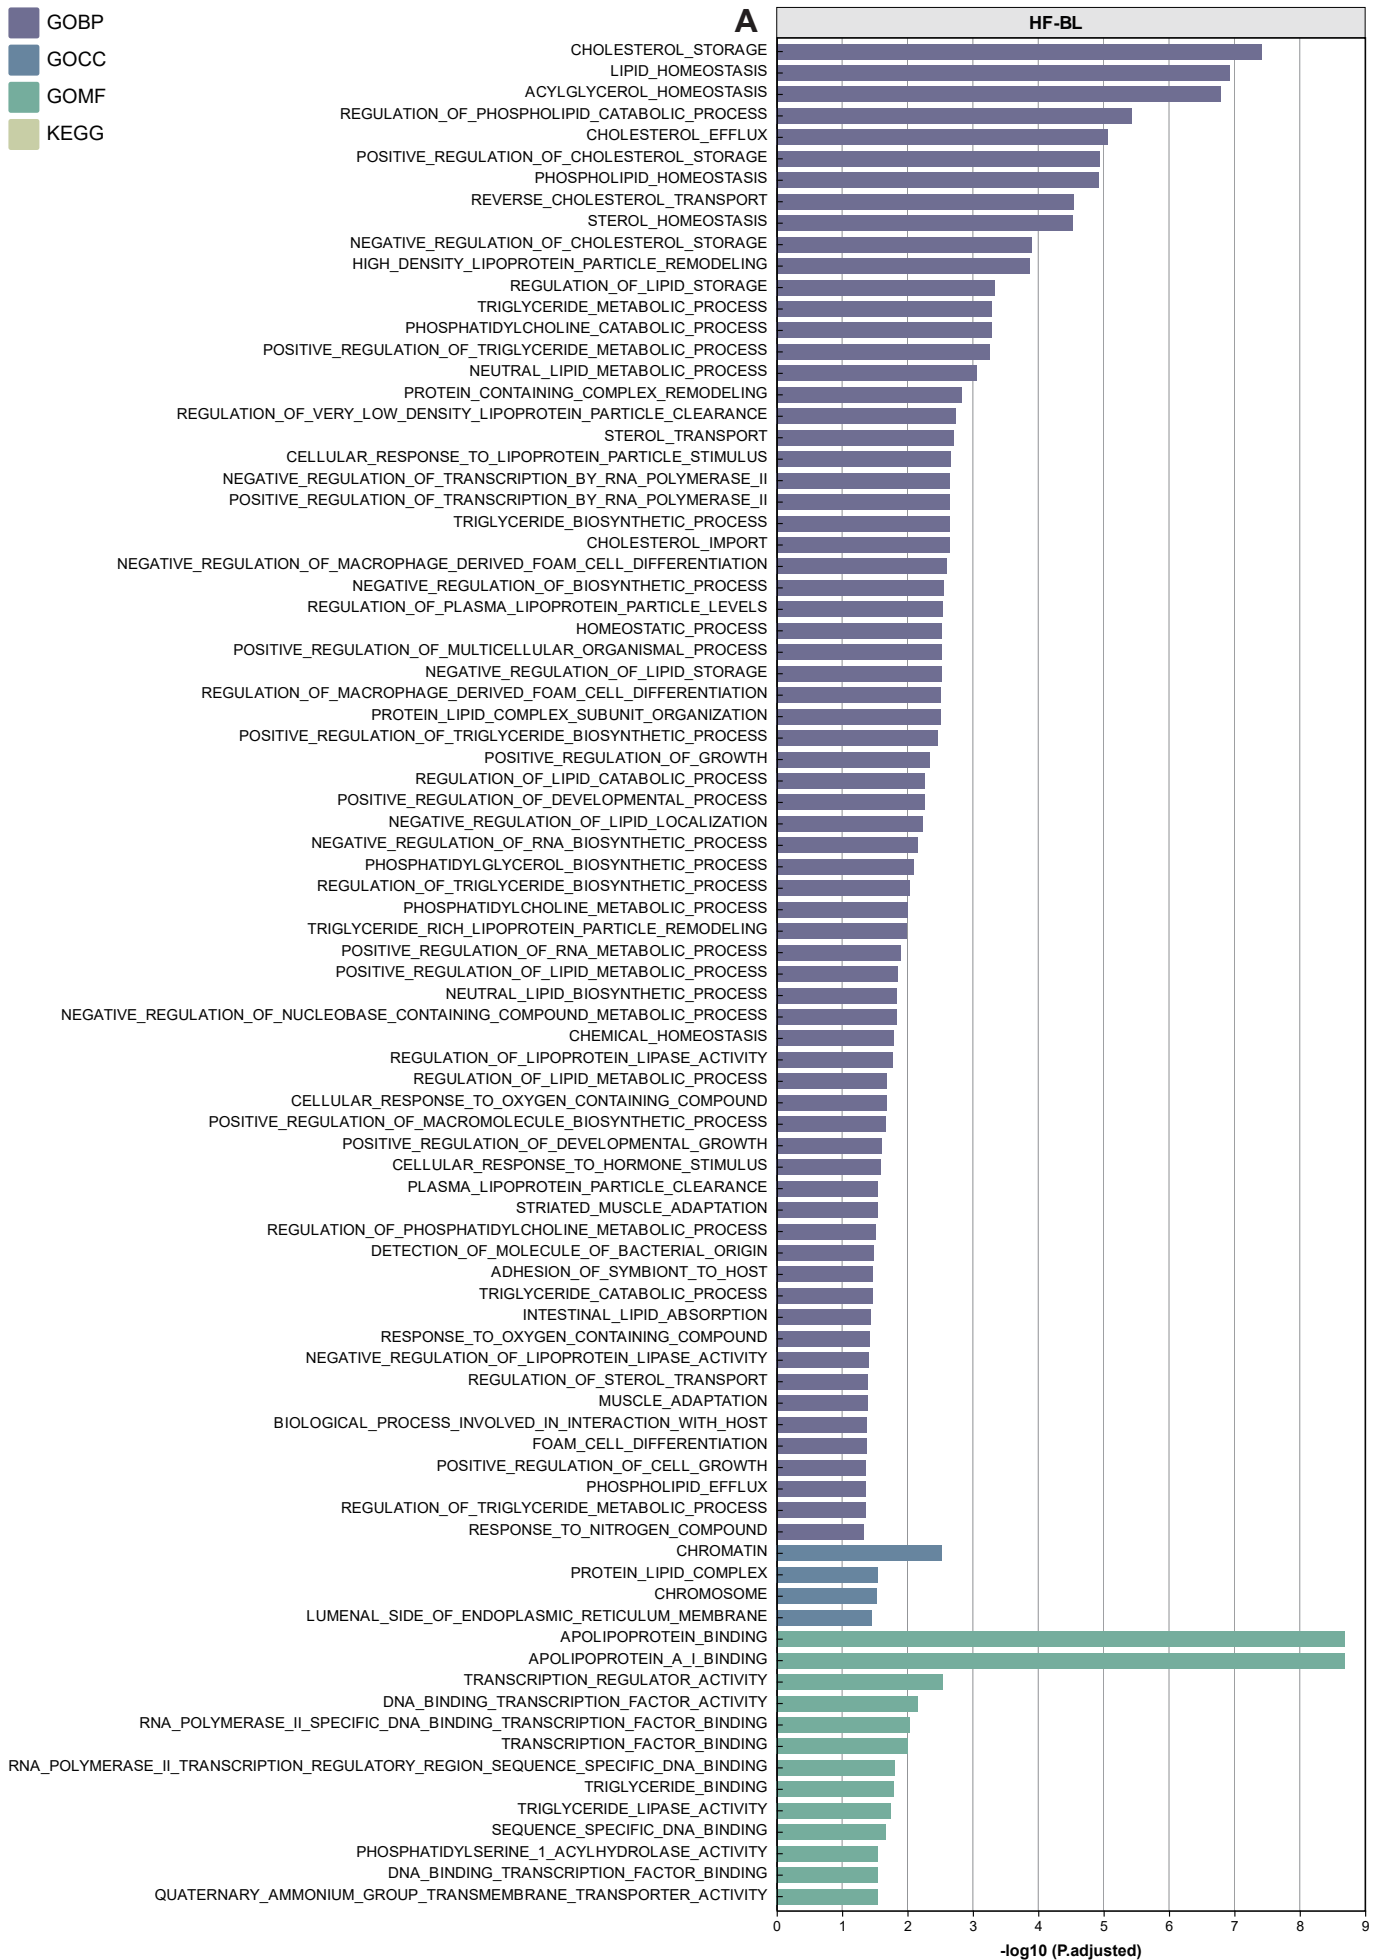

- GOBP
- GOCC
- GOMF
- KEGG

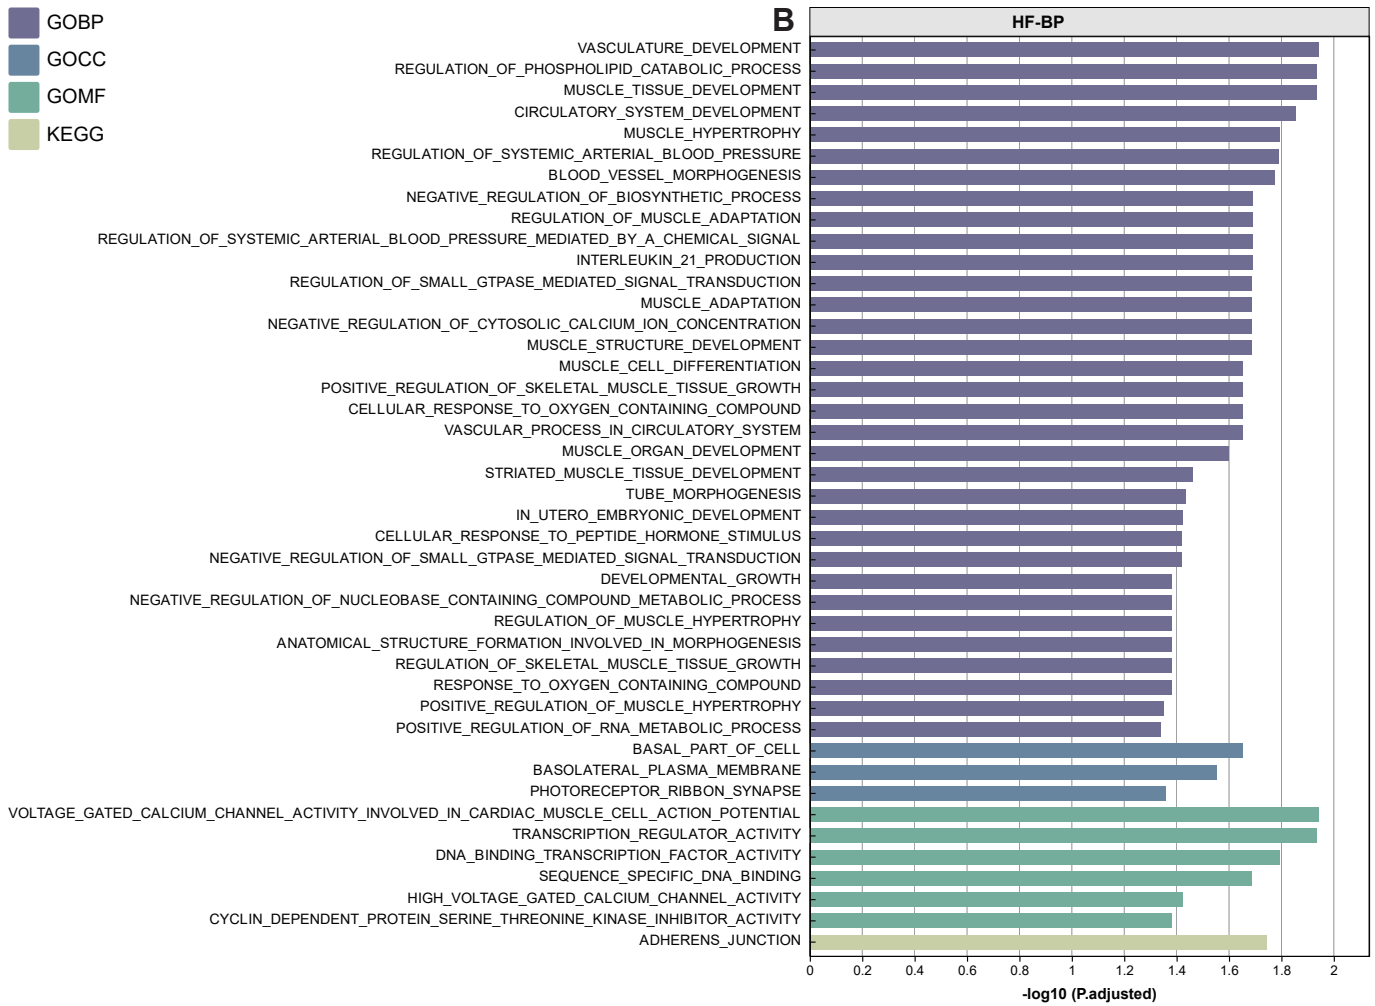

- GOBP
- GOCC
- GOMF
- KEGG

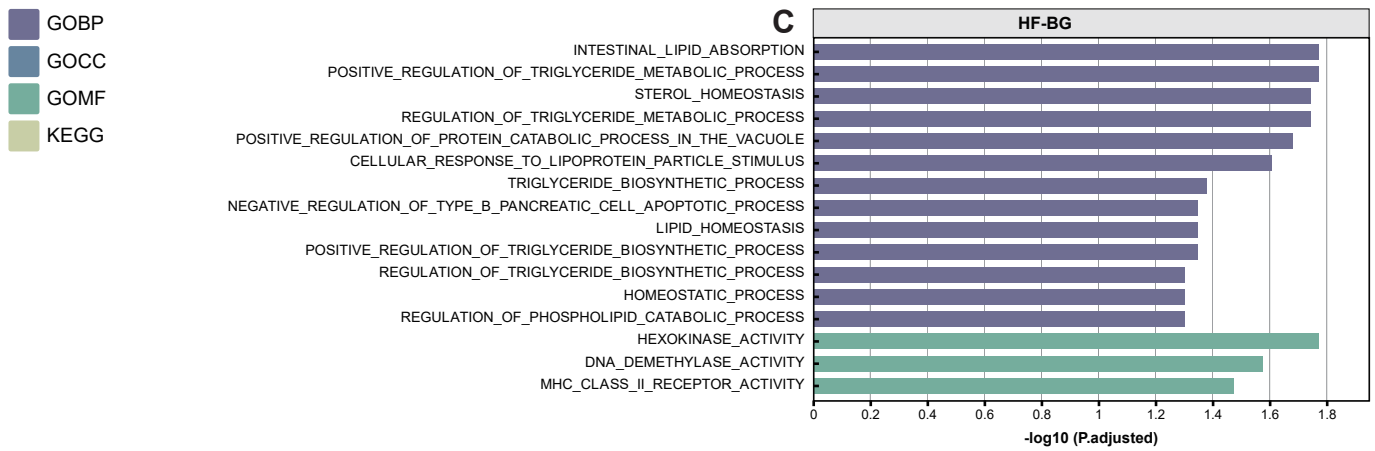

Supplement: Supplementary file [file media-6.pdf]
