# Supplementary material for: Exploring novel risk loci for heart failure and the shared genetic etiology with blood lipids, blood pressure, and blood glucose: a large-scale multi-trait association analysis
Source: bioRxiv or medRxiv preprint supplement (doi:10.1101/2023.12.20.23300280), 2023-12-21

**A****HF-BL**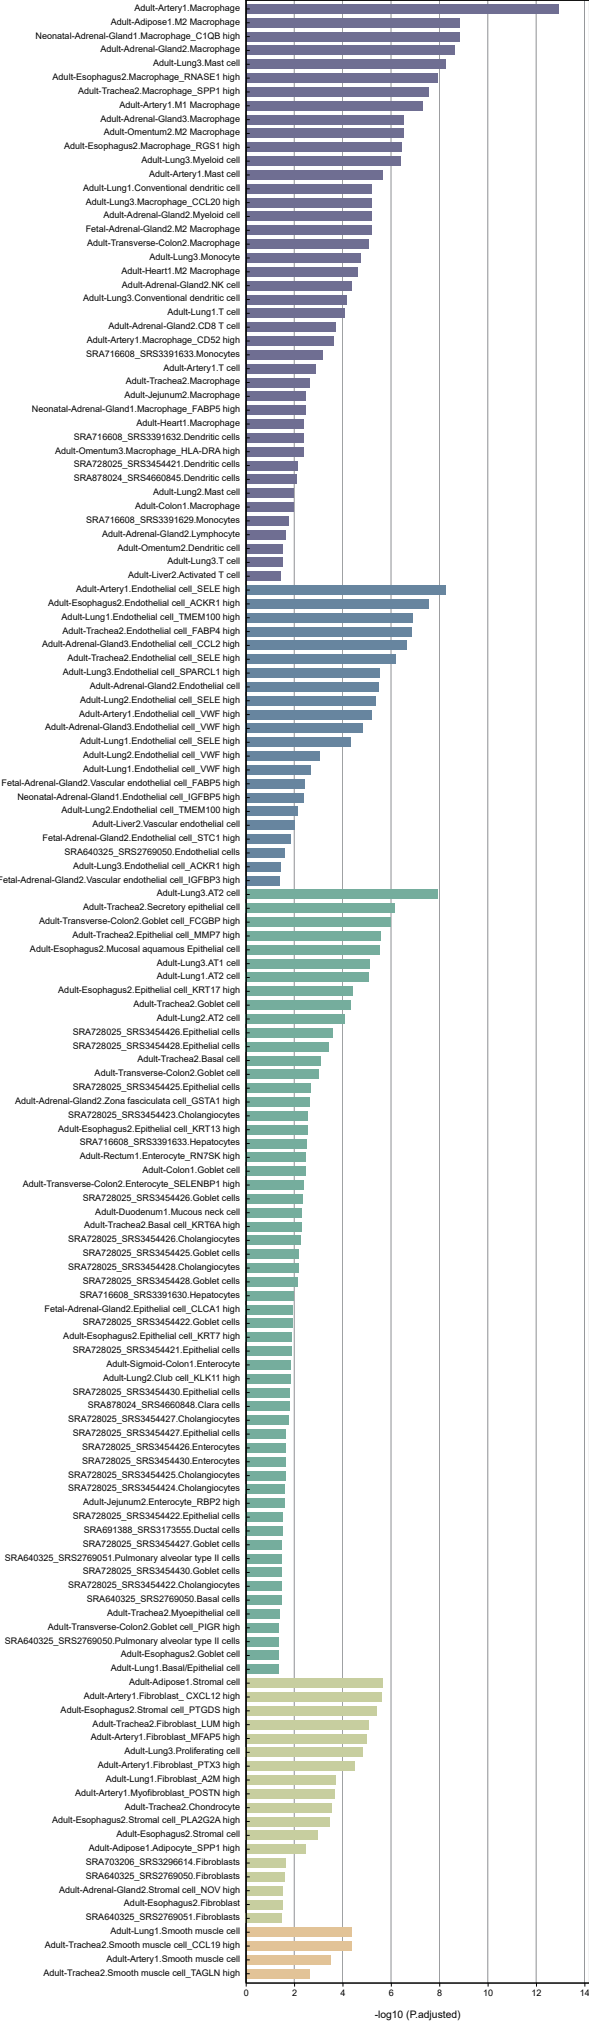**B****HF-BP**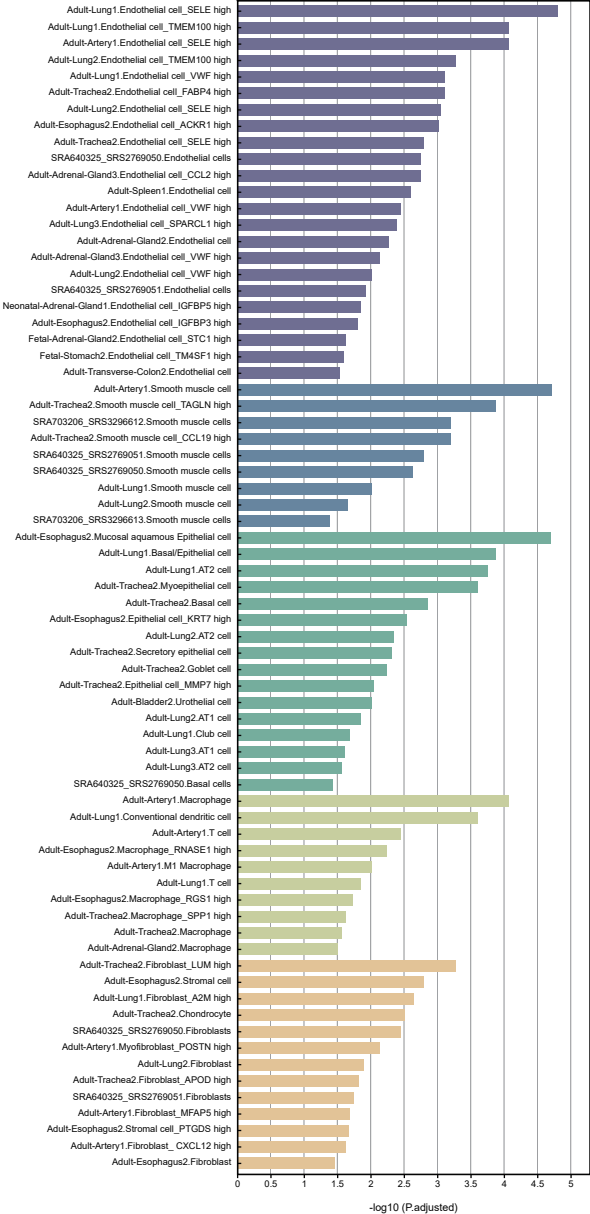 $-\log_{10}(P_{\text{adjusted}})$  $-\log_{10}(P_{\text{adjusted}})$

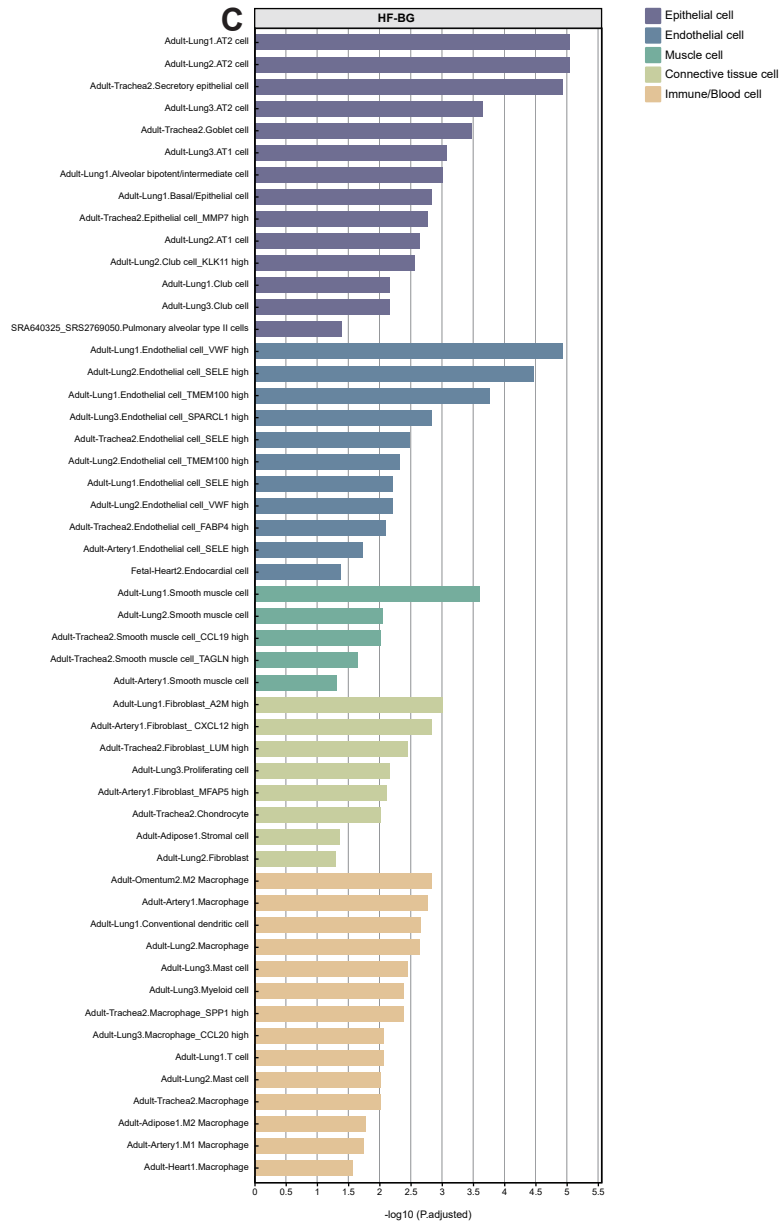

Supplement: Supplementary file [file media-8.pdf]
