# Supplementary material for: Exploring novel risk loci for heart failure and the shared genetic etiology with blood lipids, blood pressure, and blood glucose: a large-scale multi-trait association analysis
Source: bioRxiv or medRxiv preprint supplement (doi:10.1101/2023.12.20.23300280), 2023-12-21

**A**

**HF-BL**

Metabolic  
Other  
Cardiovascular  
Body measure

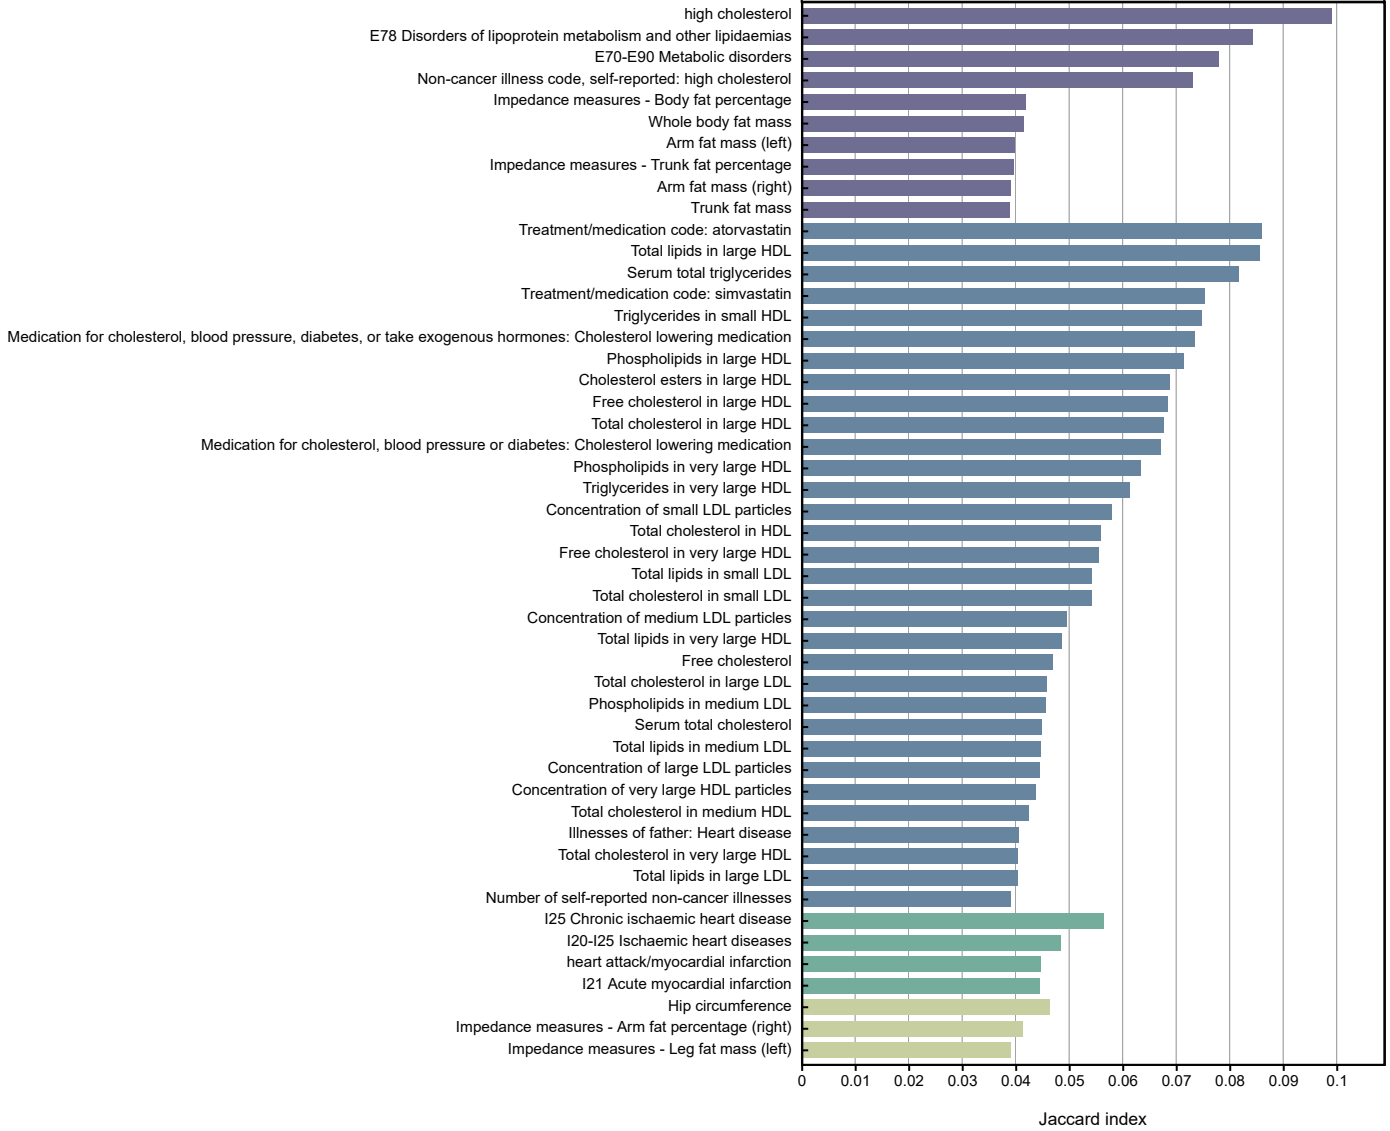

**B**

**HF-BP**

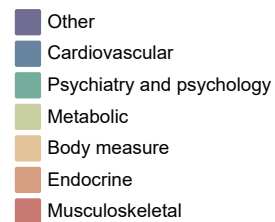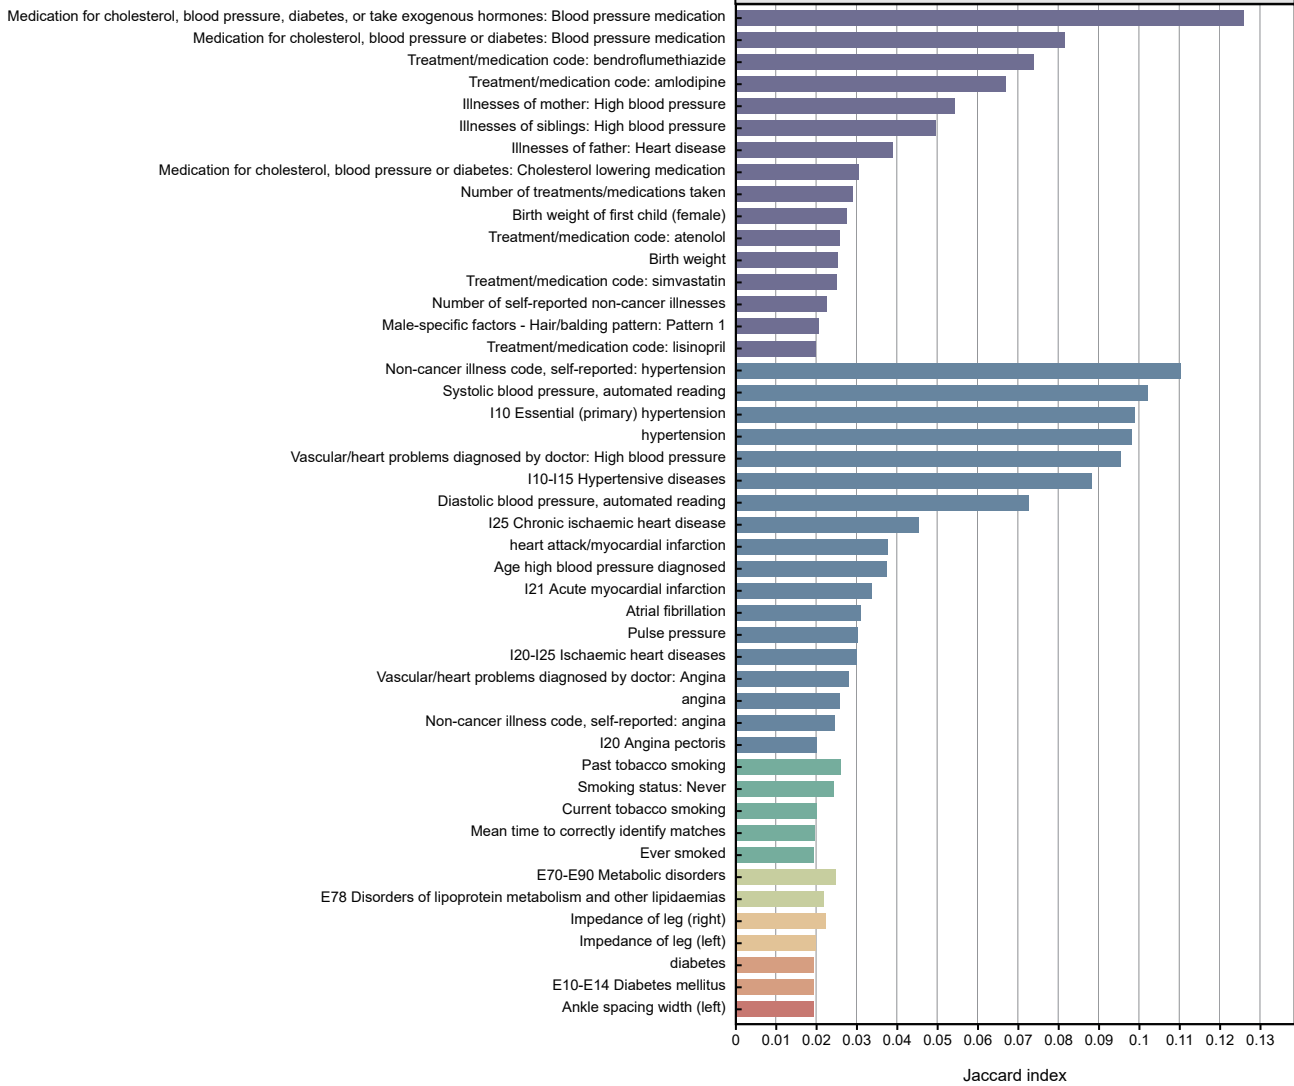

C

HF-BG

- Endocrine
- Other
- Cardiovascular
- Body measure
- Metabolic
- Immune/Blood

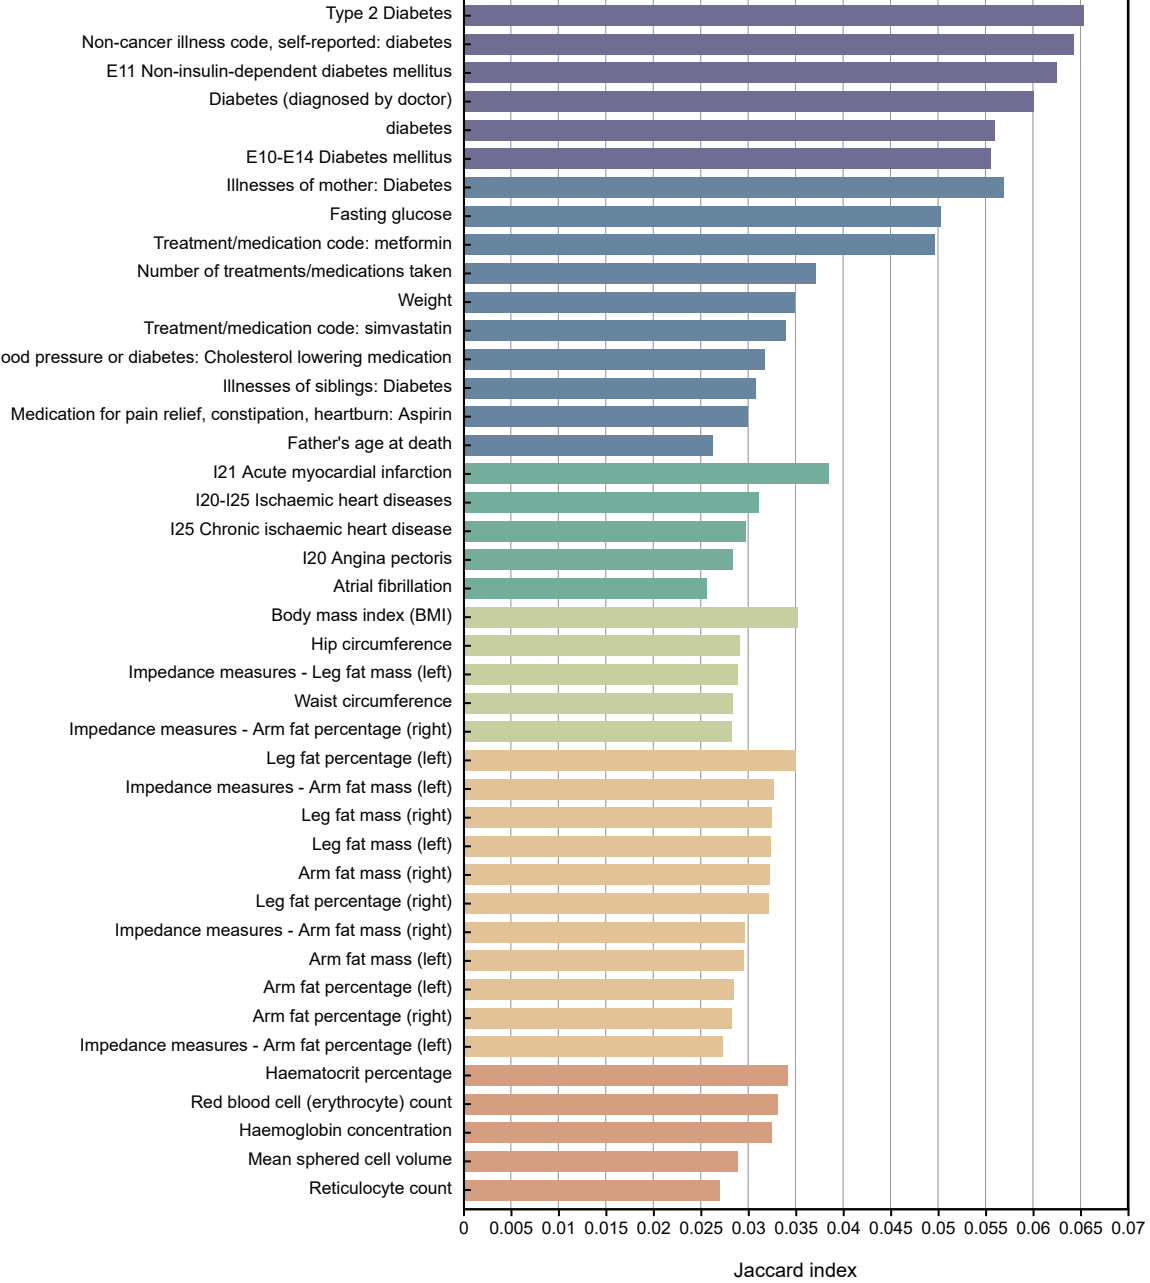

Supplement: Supplementary file [file media-9.pdf]
